# Supplementary material
Source: publisher site journal article supplement (https://www.dovepress.com/article/374487)
Supplement: Supplementary file 1 [file get_supplementary_file.php]

Supplementary material S1

**Appendix 3: Interview guide**

1. **Interview guide for Women**

1. What do you know about cervical cancer?
2. How can you prevent it / or how it can be prevented?
3. What do you know about cervical cancer screening test?
4. Any one in your family/ friends goes for this test?
5. How did they fell about this test?
6. Have you ever considered going for this test?
7. If yes to question no 6: did someone suggest you to go for that test? What motivated you to go for that test? What happens when you go to the doctor? What can you tell to other women/ friends about this test?
8. If no to question no 6: Why did you not go?
9. Closing question:

- Do you have any question, requests/suggestions?
